# Supplementary material for: Structure and IR Spectroscopic Properties of HNCO Complexes with SO2 Isolated in Solid Argon
Source: MDPI journal article supplement (doi:10.3390/molecules26216441), 2021-10-25
Supplement: s1 [file s1]

# Supplementary Materials

Structure and IR spectroscopic properties of HNCO complexes with SO<sub>2</sub> isolated in solid argon

Justyna Krupa, Maria Wierzejewska, Jan Lundell

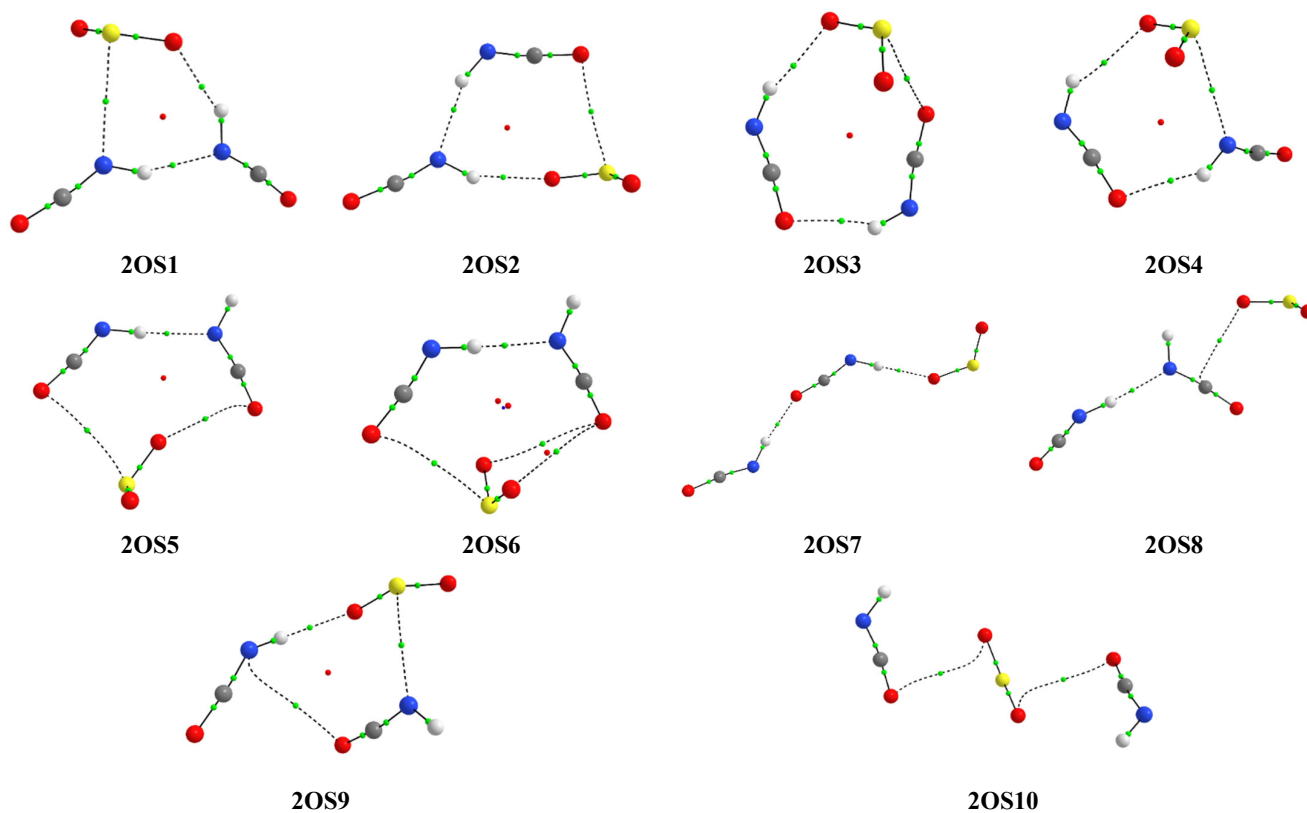

Figure S1. The MP2 optimized structures of the 2:1 complexes of HNCO with SO<sub>2</sub>. Red dots are the RCP's.

Table S1. The MP2 cartesian coordinates of all 1:1, 1:2 and 2:1 optimized species of HNCO with SO<sub>2</sub>.

| Complex 1:1 |             |             |             |      |             |             |             |      |             |             |             |
|-------------|-------------|-------------|-------------|------|-------------|-------------|-------------|------|-------------|-------------|-------------|
| OS1         |             |             |             | OS2  |             |             |             | OS3  |             |             |             |
| 0 1         |             |             |             | 0 1  |             |             |             | 0 1  |             |             |             |
| H           | 1.03577300  | -0.89686800 | 0.00005500  | H    | -1.03270300 | 0.23319600  | 0.00040100  | N    | 2.04491700  | -0.56185800 | -0.00000100 |
| N           | 2.04278300  | -0.94373300 | 0.00010600  | N    | -1.93398400 | 0.68486900  | 0.00055900  | C    | 3.13866800  | -0.02848500 | 0.00000300  |
| C           | 2.80132000  | 0.00683200  | 0.00000600  | C    | -3.01319300 | 0.12452400  | 0.00003300  | H    | 1.15724200  | -0.08434000 | -0.00001100 |
| O           | 3.65038300  | 0.81480600  | -0.00007000 | O    | -4.11722300 | -0.26909700 | -0.00038800 | O    | 4.25169300  | 0.33661100  | 0.00000900  |
| S           | -2.25101400 | -0.11632800 | -0.00003600 | S    | 2.29421000  | -0.38269400 | -0.00002100 | O    | -3.38809100 | 0.38821900  | 0.00000600  |
| O           | -2.08796700 | 1.31862600  | 0.00007500  | O    | 2.73444700  | 0.99238700  | -0.00031600 | O    | -0.89262300 | 0.43666300  | -0.00001700 |
| O           | -1.07828500 | -0.96802400 | -0.00003800 | O    | 0.87557300  | -0.67970500 | 0.00018200  | S    | -2.12946900 | -0.31898000 | 0.00000100  |
| OS4         |             |             |             | OS5  |             |             |             |      |             |             |             |
| 0 1         |             |             |             | 0 1  |             |             |             |      |             |             |             |
| H           | 1.08364000  | -1.47169000 | 0.46603600  | H    | -2.35442200 | 1.56771700  | 0.56389500  |      |             |             |             |
| N           | 1.37385400  | -0.69542500 | -0.10590600 | N    | -2.71791000 | 0.65418700  | 0.35181300  |      |             |             |             |
| C           | 2.44915100  | -0.12898000 | 0.01774500  | C    | -2.02682500 | -0.28516100 | 0.00825600  |      |             |             |             |
| O           | 3.42904500  | 0.50678100  | 0.01353100  | O    | -1.48974500 | -1.27072300 | -0.33031500 |      |             |             |             |
| S           | -1.64858800 | 0.09826400  | -0.36284400 | S    | 1.50210000  | 0.05908400  | -0.34829400 |      |             |             |             |
| O           | -1.58670300 | 1.34021800  | 0.37437000  | O    | 0.61903700  | 1.19322400  | -0.17130800 |      |             |             |             |
| O           | -1.71960700 | -1.15433300 | 0.35889100  | O    | 2.05910100  | -0.59517600 | 0.81369600  |      |             |             |             |
| Complex 1:2 |             |             |             |      |             |             |             |      |             |             |             |
| O2S1        |             |             |             | O2S2 |             |             |             | O2S3 |             |             |             |
| 0 1         |             |             |             | 0 1  |             |             |             | 0 1  |             |             |             |
| H           | -0.45883600 | -1.46973900 | -0.02945700 | N    | -1.37991100 | -1.10174500 | -0.57587500 | H    | -1.79206800 | 1.82455700  | -0.56862200 |
| N           | -1.37378800 | -1.14361300 | 0.25286700  | C    | -2.27419200 | -1.73617100 | -0.03999900 | N    | -1.07714900 | 2.50500400  | -0.35888900 |
| C           | -2.40532100 | -1.78438700 | 0.13505200  | H    | -0.42659000 | -1.42677400 | -0.67214200 | C    | -0.02935600 | 2.25656600  | 0.19964800  |
| O           | -3.46499300 | -2.27602000 | 0.08676300  | O    | -3.22317400 | -2.22260200 | 0.43903600  | O    | 1.02127400  | 2.16034800  | 0.71707900  |
| O           | 3.04234500  | -0.39538000 | 1.01120100  | S    | -0.96568500 | 1.88855500  | -0.34524900 | O    | -1.30205700 | -0.76498300 | 1.34133000  |
| S           | 2.61411900  | -0.49124300 | -0.36412500 | O    | -1.44578400 | 1.98796100  | 1.01356300  | S    | -1.87345000 | -1.23135600 | 0.09859300  |
| O           | 1.49241100  | -1.34738700 | -0.69674100 | O    | 0.44443200  | 1.64925100  | -0.57965100 | O    | -2.47582100 | -0.26608100 | -0.80096000 |
| O           | 0.46035600  | 1.59860100  | 0.05112900  | S    | 2.54507600  | -0.49057200 | -0.05234000 | O    | 0.89275300  | -0.57244900 | -1.09122900 |
| S           | -0.93603500 | 1.85090100  | 0.34494900  | O    | 1.63473000  | -1.29581200 | -0.84361600 | S    | 2.17872300  | -0.46260800 | -0.42974700 |
| O           | -1.82287800 | 2.22353900  | -0.73286300 | O    | 2.39740300  | -0.47026300 | 1.38375200  | O    | 2.44183400  | -1.28128000 | 0.73145800  |

**O2S4**

|     |             |             |             |
|-----|-------------|-------------|-------------|
| O 1 |             |             |             |
| N   | 0.07432800  | 2.76843000  | 0.08980400  |
| C   | -1.02617100 | 2.26207800  | 0.11249000  |
| H   | 0.93302500  | 2.30339300  | -0.16550200 |
| O   | -2.14325700 | 1.90150100  | 0.18129700  |
| S   | 2.44968200  | -0.63403800 | -0.33212300 |
| O   | 2.75892300  | -0.87590000 | 1.05731600  |
| O   | 2.18162000  | 0.72089300  | -0.77218000 |
| S   | -1.96183400 | -1.17113500 | 0.32681000  |
| O   | -2.65566300 | -1.58800200 | -0.86960700 |
| O   | -0.52935700 | -0.95500500 | 0.27154300  |

**O2S5**

|     |             |             |             |
|-----|-------------|-------------|-------------|
| O 1 |             |             |             |
| S   | -3.47138000 | 0.19391900  | 0.29087400  |
| O   | -2.50415000 | 1.16224000  | -0.18252400 |
| O   | -3.53944000 | -1.10662400 | -0.33681100 |
| S   | 0.42497500  | -0.14766700 | -0.40087900 |
| O   | -0.11241000 | -0.71552200 | 0.81538300  |
| O   | 1.24877500  | 1.04039300  | -0.31954800 |
| N   | 4.53191400  | 0.84249300  | 0.33555700  |
| C   | 3.96493000  | -0.20233600 | 0.07802100  |
| H   | 4.05552100  | 1.72637100  | 0.40034000  |
| O   | 3.55397200  | -1.27421800 | -0.15866100 |

**O2S6**

|     |             |             |             |
|-----|-------------|-------------|-------------|
| O 1 |             |             |             |
| H   | 3.49981300  | 2.26515100  | -0.16143000 |
| N   | 4.19032500  | 1.54501900  | -0.28962700 |
| C   | 3.94809300  | 0.35683400  | -0.20000200 |
| O   | 3.86140200  | -0.81096100 | -0.14543300 |
| O   | 1.00421900  | 0.64291000  | 0.44835400  |
| S   | 0.62455800  | -0.75433500 | 0.45838000  |
| O   | 0.04375100  | -1.33254400 | -0.73292100 |
| O   | -4.53188900 | 0.60245100  | -0.30300700 |
| S   | -3.14639300 | 0.19157400  | -0.33296000 |
| O   | -2.39889300 | 0.12100400  | 0.90577000  |

**Complex 2:1****2OS1**

|     |             |             |             |
|-----|-------------|-------------|-------------|
| O 1 |             |             |             |
| H   | 0.47662600  | 1.06132600  | -0.28183300 |
| N   | -0.49546100 | 1.33975000  | -0.37731000 |
| C   | -0.93689300 | 2.44328700  | -0.10356600 |
| O   | -1.49573800 | 3.44737600  | 0.11461900  |
| H   | 1.50505400  | -1.11798800 | -0.13267900 |
| N   | 2.03861600  | -0.25955500 | -0.08363200 |
| C   | 3.24598700  | -0.21651800 | 0.10137100  |
| O   | 4.38515900  | -0.02625100 | 0.26962000  |
| O   | -0.41783200 | -1.92114400 | -0.46089800 |
| S   | -1.76092200 | -1.40861500 | -0.26959100 |
| O   | -2.27953500 | -1.29091500 | 1.07262500  |

**2OS2**

|     |             |             |             |
|-----|-------------|-------------|-------------|
| O 1 |             |             |             |
| H   | -1.35525000 | -0.65805400 | -0.29454500 |
| N   | -2.16323000 | -0.07828700 | -0.10714600 |
| C   | -3.29256500 | -0.51459200 | 0.05788000  |
| O   | -4.41382400 | -0.78835700 | 0.23356000  |
| H   | -1.24999100 | 1.80834800  | 0.00459400  |
| N   | -0.46898200 | 2.45395800  | 0.01463900  |
| C   | 0.70034900  | 2.14130800  | 0.05308700  |
| O   | 1.86420400  | 1.96969500  | 0.08603100  |
| O   | 0.66767100  | -1.01030700 | -0.73129800 |
| S   | 2.05353900  | -1.08985500 | -0.30827400 |
| O   | 2.34787400  | -1.43385700 | 1.06221700  |

**2OS3**

|     |             |             |             |
|-----|-------------|-------------|-------------|
| O 1 |             |             |             |
| H   | 0.10823500  | -1.93010900 | -0.86204800 |
| N   | 1.10994000  | -2.03704700 | -0.79481500 |
| C   | 1.85416900  | -1.45289200 | -0.03952500 |
| O   | 2.69218200  | -0.95614400 | 0.62091700  |
| H   | 2.42858000  | 1.22507400  | 0.51007100  |
| N   | 1.84868300  | 1.99950400  | 0.22384200  |
| C   | 0.78419600  | 1.92303100  | -0.34891300 |
| O   | -0.25361100 | 1.99757300  | -0.89790200 |
| S   | -2.12719000 | -0.09848100 | 0.25519000  |
| O   | -1.24433300 | -0.02414400 | 1.39725400  |
| O   | -1.82452600 | -1.05194800 | -0.79572200 |

**2OS4**

|     |             |             |             |
|-----|-------------|-------------|-------------|
| 0 1 |             |             |             |
| H   | 2.14406000  | 0.77259900  | -1.30014400 |
| N   | 1.99247300  | 1.71246800  | -0.96737700 |
| C   | 1.22774100  | 2.00840400  | -0.07509900 |
| O   | 0.52027700  | 2.43546300  | 0.76197500  |
| H   | -1.17981000 | 1.09617200  | 0.73323600  |
| N   | -1.58539400 | 0.25793700  | 0.33855800  |
| C   | -2.74037300 | 0.17598400  | -0.04918800 |
| O   | -3.81146800 | -0.05208300 | -0.45723000 |
| O   | 1.26653700  | -1.11105900 | 1.30999500  |
| S   | 0.73595600  | -1.76365800 | 0.13447700  |
| O   | 1.21049200  | -1.34099600 | -1.16939900 |

**2OS7**

|     |             |             |             |
|-----|-------------|-------------|-------------|
| 0 1 |             |             |             |
| H   | 1.27797000  | 0.75608900  | -0.04560600 |
| N   | 0.47376000  | 1.30890700  | 0.20841000  |
| C   | -0.67881700 | 1.17423000  | -0.12998400 |
| O   | -1.83024000 | 1.17566000  | -0.37086500 |
| H   | -3.45712500 | -0.03573500 | -0.05345700 |
| N   | -4.16030100 | -0.73962600 | 0.11425300  |
| C   | -5.36346900 | -0.56781800 | 0.12062300  |
| O   | -6.53533100 | -0.55811800 | 0.15890700  |
| O   | 4.89895600  | 0.06181400  | 0.89383300  |
| S   | 4.29066400  | -0.66712300 | -0.19343400 |
| O   | 2.91512000  | -0.38808300 | -0.55793400 |

**2OS5**

|     |             |             |             |
|-----|-------------|-------------|-------------|
| 0 1 |             |             |             |
| H   | 1.20228600  | 1.83859800  | 0.16123300  |
| N   | 0.43970100  | 2.50002700  | 0.05714800  |
| C   | -0.72857700 | 2.20954600  | -0.08380800 |
| O   | -1.88635800 | 2.06232500  | -0.22626000 |
| H   | 3.54518200  | 0.96541500  | 1.01106400  |
| N   | 2.78974600  | 0.58196900  | 0.46481100  |
| C   | 2.83653600  | -0.56965500 | 0.04515000  |
| O   | 2.75675700  | -1.63658100 | -0.41460900 |
| O   | -0.25529900 | -0.78089300 | -0.24763700 |
| S   | -1.65266800 | -1.15962200 | -0.29812700 |
| O   | -2.30993300 | -1.60277300 | 0.91050200  |

**2OS8**

|     |             |             |             |
|-----|-------------|-------------|-------------|
| 0 1 |             |             |             |
| H   | 2.72220300  | -0.32419400 | 0.54155100  |
| N   | 3.69429100  | -0.38722000 | 0.81765400  |
| C   | 4.66158000  | -0.17671300 | 0.11299200  |
| O   | 5.68129100  | -0.00730100 | -0.44158900 |
| H   | 0.24418500  | -1.24318700 | 0.11629800  |
| N   | 0.70622400  | -0.34660900 | 0.07121900  |
| C   | 0.05412500  | 0.65444900  | -0.19722900 |
| O   | -0.44557300 | 1.67950300  | -0.44279400 |
| O   | -2.39648300 | -1.07936700 | -0.57829400 |
| S   | -3.53878900 | -0.27233000 | -0.19860400 |
| O   | -3.51968600 | 0.43154700  | 1.06306800  |

**2OS6**

|     |             |             |             |
|-----|-------------|-------------|-------------|
| 0 1 |             |             |             |
| H   | 0.09549300  | 2.07209700  | 0.00084900  |
| N   | 1.09563200  | 2.23680900  | 0.00190500  |
| C   | 1.94262800  | 1.36794700  | 0.00082000  |
| O   | 2.85621900  | 0.62934300  | 0.00004900  |
| H   | -2.52911400 | 2.60493100  | -0.00332900 |
| N   | -1.95856000 | 1.77453200  | -0.00081700 |
| C   | -2.45171100 | 0.65347500  | 0.00057400  |
| O   | -2.78258800 | -0.46429200 | 0.00222400  |
| O   | 0.18418600  | -1.11614600 | 1.24693200  |
| S   | 0.50101900  | -1.77527400 | -0.00212700 |
| O   | 0.18122200  | -1.10897400 | -1.24663900 |

**2OS9**

|     |             |             |             |
|-----|-------------|-------------|-------------|
| 0 1 |             |             |             |
| H   | -0.96179800 | -1.33075700 | 0.15184900  |
| N   | -1.77744400 | -1.34211900 | -0.44199500 |
| C   | -2.85921700 | -0.86431800 | -0.15132000 |
| O   | -3.94787400 | -0.45338400 | -0.01962500 |
| H   | 0.63073600  | 2.60706900  | -1.47458300 |
| N   | 0.54001100  | 1.87180400  | -0.79307100 |
| C   | -0.35020400 | 1.84916000  | 0.04554800  |
| O   | -1.12738100 | 1.68106500  | 0.89993700  |
| O   | 1.05634900  | -0.99232900 | 0.72325500  |
| S   | 2.10065900  | -0.71965800 | -0.24599300 |
| O   | 3.34879100  | -0.15768100 | 0.21377300  |

## 2OS10

0 1

|   |             |             |             |
|---|-------------|-------------|-------------|
| H | -3.37058800 | 1.48817600  | 1.33214400  |
| N | -3.88376300 | 0.69368300  | 0.98996200  |
| C | -3.40915700 | -0.15676800 | 0.26254000  |
| O | -3.08816800 | -1.04353500 | -0.43411400 |
| H | 3.40104600  | -1.44506400 | 1.37470500  |
| N | 3.90037900  | -0.65491200 | 1.00343100  |
| C | 3.40954900  | 0.16831100  | 0.25590900  |
| O | 3.07276100  | 1.03071900  | -0.46355200 |
| O | -0.65228100 | 1.05826000  | -0.03698000 |
| S | -0.00217300 | -0.01334800 | -0.76049900 |
| O | 0.65339400  | -1.06672000 | -0.01576800 |

Table S2. Interatomic distances (Å), angles (degree) and electron density parameters of the intermolecular bond critical points BCP (au) and ring critical points RCP(au) of the HNCO complexes with SO<sub>2</sub> (1:2) computed at the MP2/6-311++G(3df,3pd) level.

| Complex     | Intermolecular parameters <sup>a</sup> |       |             | AIM parameters |           |                   |
|-------------|----------------------------------------|-------|-------------|----------------|-----------|-------------------|
|             | Interatomic distances                  |       | Angle       | BCP            | $\rho(r)$ | $\nabla^2\rho(r)$ |
|             | H...Y                                  | X...Y | X-H...Y     |                |           |                   |
| <b>O2S1</b> | 2.066                                  | 3.026 | 157.7       | H1...O6        | 0.0197    | +0.0767           |
|             |                                        | 3.030 |             | S5...O9        | 0.0108    | +0.0402           |
|             |                                        | 3.028 |             | S8...N2        | 0.0135    | +0.0423           |
|             |                                        |       | <b>RCP</b>  | (6 at.)        | 0.0034    | +0.0163           |
| <b>O2S2</b> | 2.072                                  | 3.033 | 157.6       | H1...O6        | 0.0166    | +0.0649           |
|             |                                        | 3.045 |             | S5...O9        | 0.0093    | +0.0338           |
|             |                                        | 3.475 |             | S8...N2        | 0.0120    | +0.0369           |
|             |                                        |       | <b>RCP</b>  | (6 at.)        | 0.0030    | +0.0143           |
| <b>O2S3</b> | 2.212                                  | 3.135 | 151.4       | H1...O6        | 0.0150    | +0.0544           |
|             |                                        | 3.082 |             | S5...O9        | 0.0105    | +0.0356           |
|             |                                        | 3.088 |             | S8...O4        | 0.0110    | +0.0358           |
|             |                                        | 3.472 |             | C3...O7        | 0.0052    | +0.0196           |
|             |                                        |       | <b>RCP1</b> | HNCOSO         | 0.0050    | +0.0196           |
|             |                                        |       | <b>RCP2</b> | COSOSO         | 0.0028    | +0.0136           |
| <b>O2S4</b> | 2.105                                  | 3.062 | 157.5       | H1...O6        | 0.0153    | +0.0606           |
|             |                                        | 3.056 |             | S5...O9        | 0.0090    | +0.0324           |
|             |                                        | 3.081 |             | S8...O4        | 0.0095    | +0.0317           |
|             |                                        |       | <b>RCP</b>  | (8 at.)        | 0.0018    | +0.0082           |
| <b>O2S5</b> |                                        | 3.573 |             | C3...O6        | 0.0070    | +0.0288           |
|             |                                        | 3.216 |             | S5...O9        | 0.0075    | +0.0263           |
| <b>O2S6</b> |                                        | 3.293 |             | S5...O4        | 0.0081    | +0.0289           |
|             |                                        | 3.179 |             | S5...O9        | 0.0089    | +0.0312           |

<sup>a</sup> X: N, S or C  
Y: O or N

Table S3. Interatomic distances (Å), angles (degree) and electron density parameters of the intermolecular bond critical points (au) of the HNCO complexes with SO<sub>2</sub> (2:1) computed at the MP2/6-311++G(3df,3pd) level.

| Complex      | Intermolecular parameters <sup>a</sup> |       |             | AIM parameters |           |                   |
|--------------|----------------------------------------|-------|-------------|----------------|-----------|-------------------|
|              | Interatomic distances                  |       | Angle       | BCP            | $\rho(r)$ | $\nabla^2\rho(r)$ |
|              | H...Y                                  | X...Y | X-H...Y     |                |           |                   |
| <b>2OS1</b>  | 2.055                                  | 3.011 | 155.9       | H1...N6        | 0.0204    | +0.0674           |
|              | 2.110                                  | 2.990 | 144.2       | H5...O10       | 0.0149    | +0.0628           |
|              |                                        | 3.028 |             | S9...N2        | 0.0119    | +0.0369           |
|              |                                        |       | <b>RCP</b>  | (6 at.)        | 0.0038    | +0.0180           |
| <b>2OS2</b>  | 2.099                                  | 3.045 | 154.7       | H1...O10       | 0.0152    | +0.0621           |
|              |                                        | 3.091 |             | S9...O8        | 0.0093    | +0.0309           |
|              | 2.099                                  | 3.049 | 155.3       | H5...N2        | 0.0188    | +0.0628           |
|              |                                        |       | <b>RCP</b>  | (8 at.)        | 0.0025    | +0.0111           |
| <b>2OS3</b>  | 2.124                                  | 3.095 | 160.8       | H1...O10       | 0.0157    | +0.0575           |
|              |                                        | 3.039 |             | S9...O8        | 0.0102    | +0.0343           |
|              | 2.200                                  | 3.099 | 147.6       | H5...O4        | 0.0136    | +0.0504           |
|              |                                        |       | <b>RCP</b>  | (10 at.)       | 0.0012    | +0.0053           |
| <b>2OS4</b>  | 2.315                                  | 3.158 | 140.5       | H1...O10       | 0.0112    | +0.0395           |
|              |                                        | 3.085 |             | S9...N6        | 0.0107    | +0.0332           |
|              | 2.164                                  | 3.058 | 146.4       | H5...O4        | 0.0143    | +0.0553           |
|              |                                        |       | <b>RCP</b>  | (8 at.)        | 0.0021    | +0.0101           |
| <b>2OS5</b>  | 2.047                                  | 3.061 | 176.3       | H1...N6        | 0.0211    | +0.0653           |
|              |                                        | 3.136 |             | O8...O10       | 0.0055    | +0.0234           |
|              |                                        | 3.231 |             | S9...O4        | 0.0075    | +0.0264           |
|              |                                        |       | <b>RCP</b>  | (9 at.)        | 0.0028    | +0.0122           |
| <b>2OS6</b>  | 2.076                                  | 3.089 | 178.9       | H1...N6        | 0.0197    | +0.0627           |
|              |                                        | 3.283 |             | O8...O10       | 0.0048    | +0.0184           |
|              |                                        | 3.280 |             | O8...O11       | 0.0048    | +0.0184           |
|              |                                        | 3.366 |             | S9...O4        | 0.0058    | +0.0229           |
|              |                                        |       | <b>RCP1</b> | (9 at.)        | 0.0017    | +0.0074           |
|              |                                        |       | <b>RCP2</b> | (9 at.)        | 0.0017    | +0.0075           |
|              |                                        |       | <b>RCP3</b> | (4 at.)        | 0.0044    | +0.0198           |
| <b>2OS7</b>  | 2.053                                  | 3.055 | 171.7       | H1...O8        | 0.0165    | +0.0672           |
|              | 2.062                                  | 3.070 | 179.5       | H5...O10       | 0.0166    | +0.0643           |
| <b>2OS8</b>  | 2.070                                  | 3.080 | 175.0       | H1...N6        | 0.0200    | +0.0635           |
|              |                                        | 3.026 |             | C7...O10       | 0.0071    | +0.0273           |
| <b>2OS9</b>  | 2.125                                  | 3.084 | 158.1       | H1...O10       | 0.0151    | +0.0590           |
|              |                                        | 3.074 |             | S9...N6        | 0.0113    | +0.0345           |
|              |                                        | 3.371 |             | O8...N2        | 0.0053    | +0.0180           |
|              |                                        |       | <b>RCP</b>  | (7 at.)        | 0.0026    | +0.0124           |
| <b>2OS10</b> |                                        | 3.242 |             | O4...O10       | 0.0071    | +0.0262           |
|              |                                        | 3.233 |             | O11...O8       | 0.0072    | +0.0262           |

<sup>a</sup> X: N, O, S or C

Y: O or N

Table S4. BSSE corrected interaction energies  $E_{\text{int}}$ , relative energies  $\Delta E$ , relative Gibbs free energies  $\Delta G$  ( $\text{kJ mol}^{-1}$ ) and dipole moments  $\mu$  (Debye) of the HNCO-SO<sub>2</sub> complexes of the 2:1 stoichiometry calculated at MP2, B3LYPD3 and B2PLYPD3 levels.

| Complex<br>2:1  | $E_{\text{int}}$ | $\Delta E$ | $\Delta G$ | $\mu$ |
|-----------------|------------------|------------|------------|-------|
| <b>MP2</b>      |                  |            |            |       |
| 2OS1            | -40.96           | 0.00       | 8.4        | 2.1   |
| 2OS2            | -39.12           | 2.24       | 11.0       | 2.5   |
| 2OS3            | -37.24           | 4.34       | 14.3       | 2.2   |
| 2OS4            | -35.82           | 5.24       | 14.4       | 1.6   |
| 2OS5            | -32.09           | 9.42       | 12.8       | 2.9   |
| 2OS6            | -31.55           | 9.61       | 12.2       | 3.1   |
| 2OS7            | -29.08           | 12.24      | 0.0        | 6.4   |
| 2OS8            | -28.33           | 13.04      | 6.9        | 5.5   |
| 2OS9            | -27.78           | 12.81      | 16.3       | 3.3   |
| 2OS10           | -22.64           | 17.92      | 12.1       | 0.2   |
| <b>B3LYPD3</b>  |                  |            |            |       |
| 2OS1            | -47.20           | 0.00       | 5.2        | 2.0   |
| 2OS2            | -45.56           | 2.17       | 6.9        | 2.6   |
| 2OS3            | -45.02           | 2.77       | 10.6       | 2.2   |
| 2OS4            | -43.68           | 3.69       | 8.5        | 1.4   |
| 2OS5            | -36.53           | 11.17      | 9.8        | 2.7   |
| 2OS6            | -36.40           | 10.82      | 9.1        | 3.1   |
| 2OS7            | -33.39           | 14.01      | 0.0        | 6.7   |
| 2OS8            | -32.72           | 14.77      | 6.4        | 5.7   |
| 2OS9            | -32.89           | 13.80      | 13.4       | 3.6   |
| 2OS10           | -29.20           | 17.54      | 10.9       | 0.2   |
| <b>B2PLYPD3</b> |                  |            |            |       |
| 2OS1            | -44.10           | 0.00       | 6.3        | 2.0   |
| 2OS2            | -42.68           | 1.95       | 8.8        | 2.5   |
| 2OS3            | -41.17           | 3.72       | 11.7       | 2.1   |
| 2OS4            | -39.46           | 4.87       | 9.9        | 1.4   |
| 2OS5            | -34.06           | 10.60      | 11.1       | 2.8   |
| 2OS6            | -33.64           | 10.61      | 10.8       | 3.0   |
| 2OS7            | -31.34           | 13.04      | 0.0        | 6.7   |
| 2OS8            | -30.08           | 14.21      | 6.1        | 5.5   |
| 2OS9            | -30.12           | 13.61      | 14.7       | 3.6   |
| 2OS10           | -25.90           | 17.75      | 10.9       | 0.4   |



Table S5. Theoretical infrared wavenumbers ( $\bar{\nu}$ ,  $\text{cm}^{-1}$ ) and intensities (I,  $\text{km mol}^{-1}$ ) for monomers and 1:1 complexes using the MP2, B3LYPD3 and B2PLYPD3 methods with basis set 6-311++G(3df,3pd).

| Mode                           | OS1         |     | OS2         |     | OS3         |     | OS4         |     | OS5         |     | HNCO        |     | SO <sub>2</sub> |    |      |     |
|--------------------------------|-------------|-----|-------------|-----|-------------|-----|-------------|-----|-------------|-----|-------------|-----|-----------------|----|------|-----|
|                                | $\bar{\nu}$ | I   | $\bar{\nu}$     | I  |      |     |
| MP2                            |             |     |             |     |             |     |             |     |             |     |             |     |                 |    |      |     |
| $\delta\text{SO}_2$            | 505         | 23  | 504         | 32  | 508         | 24  | 505         | 24  | 506         | 25  | 571         | 94  | 503             | 25 |      |     |
| $\delta\text{NCO}$             | 606         | 53  | 606         | 51  | 604         | 85  | 563         | 112 | 585         | 78  |             |     |                 |    |      |     |
| $\gamma\text{NCO}$             | 648         | 0   | 648         | 0   | 646         | 0   | 634         | 1   | 637         | 1   |             |     |                 |    | 636  | 1   |
| $\delta\text{HNC}$             | 797         | 221 | 797         | 259 | 795         | 318 | 780         | 261 | 816         | 259 |             |     |                 |    | 785  | 215 |
| $\nu_{\text{sym}}\text{SO}_2$  | 1130        | 32  | 1130        | 29  | 1130        | 21  | 1131        | 19  | 1133        | 19  | 1306        | 0   | 1128            | 19 |      |     |
| $\nu_{\text{sym}}\text{NCO}$   | 1308        | 4   | 1308        | 5   | 1308        | 6   | 1308        | 2   | 1304        | 1   |             |     |                 |    |      |     |
| $\nu_{\text{asym}}\text{SO}_2$ | 1346        | 166 | 1347        | 184 | 1347        | 199 | 1348        | 151 | 1349        | 149 |             |     |                 |    | 1350 | 154 |
| $\nu_{\text{asym}}\text{NCO}$  | 2338        | 697 | 2339        | 745 | 2338        | 744 | 2337        | 616 | 2334        | 749 |             |     |                 |    |      |     |
| $\nu\text{NH}$                 | 3663        | 603 | 3662        | 663 | 3666        | 635 | 3715        | 176 | 3697        | 158 | 3729        | 175 |                 |    |      |     |
| B3LYPD3                        |             |     |             |     |             |     |             |     |             |     |             |     |                 |    |      |     |
| $\delta\text{SO}_2$            | 524         | 34  | 521         | 43  | 526         | 30  | 522         | 27  | 522         | 29  | 576         | 83  | 519             | 29 |      |     |
| $\delta\text{NCO}$             | 613         | 40  | 615         | 38  | 616         | 78  | 568         | 98  | 596         | 62  |             |     |                 |    |      |     |
| $\gamma\text{NCO}$             | 649         | 1   | 650         | 1   | 648         | 1   | 637         | 3   | 641         | 2   |             |     |                 |    | 639  | 3   |
| $\delta\text{HNC}$             | 823         | 188 | 817         | 239 | 815         | 337 | 803         | 263 | 830         | 237 |             |     |                 |    | 798  | 205 |
| $\nu_{\text{sym}}\text{SO}_2$  | 1177        | 47  | 1178        | 48  | 1177        | 33  | 1178        | 29  | 1178        | 31  | 1336        | 0   | 1178            | 31 |      |     |
| $\nu_{\text{sym}}\text{NCO}$   | 1338        | 3   | 1339        | 10  | 1338        | 14  | 1337        | 2   | 1335        | 0   |             |     |                 |    |      |     |
| $\nu_{\text{asym}}\text{SO}_2$ | 1370        | 201 | 1372        | 250 | 1372        | 271 | 1371        | 215 | 1370        | 209 |             |     |                 |    | 1377 | 221 |
| $\nu_{\text{asym}}\text{NCO}$  | 2330        | 753 | 2331        | 837 | 2332        | 835 | 2328        | 676 | 2328        | 858 |             |     |                 |    |      |     |
| $\nu\text{NH}$                 | 3606        | 512 | 3600        | 698 | 3604        | 647 | 3664        | 159 | 3649        | 147 | 3681        | 159 |                 |    |      |     |
| B2PLYPD3                       |             |     |             |     |             |     |             |     |             |     |             |     |                 |    |      |     |
| $\delta\text{SO}_2$            | 513         | 26  | 512         | 36  | 517         | 26  | 513         | 25  | 514         | 27  | 575         | 79  | 511             | 27 |      |     |
| $\delta\text{NCO}$             | 611         | 41  | 612         | 39  | 611         | 70  | 569         | 93  | 588         | 55  |             |     |                 |    |      |     |
| $\gamma\text{NCO}$             | 647         | 0   | 647         | 0   | 645         | 0   | 633         | 2   | 635         | 2   |             |     |                 |    | 635  | 2   |
| $\delta\text{HNC}$             | 821         | 207 | 821         | 250 | 819         | 327 | 799         | 267 | 840         | 235 |             |     |                 |    | 803  | 213 |
| $\nu_{\text{sym}}\text{SO}_2$  | 1140        | 40  | 1140        | 37  | 1139        | 26  | 1140        | 23  | 1141        | 24  | 1315        | 0   | 1138            | 23 |      |     |
| $\nu_{\text{sym}}\text{NCO}$   | 1317        | 5   | 1317        | 9   | 1317        | 13  | 1317        | 3   | 1313        | 1   |             |     |                 |    |      |     |
| $\nu_{\text{asym}}\text{SO}_2$ | 1343        | 192 | 1344        | 216 | 1344        | 232 | 1343        | 181 | 1344        | 178 |             |     |                 |    | 1348 | 185 |
| $\nu_{\text{asym}}\text{NCO}$  | 2320        | 713 | 2320        | 768 | 2320        | 767 | 2318        | 636 | 2316        | 772 |             |     |                 |    |      |     |
| $\nu\text{NH}$                 | 3628        | 601 | 3627        | 681 | 3630        | 651 | 3690        | 163 | 3674        | 145 | 3702        | 159 |                 |    |      |     |

Table S6. Theoretical infrared wavenumbers ( $\bar{\nu}$ ,  $\text{cm}^{-1}$ ) and intensities (I,  $\text{km mol}^{-1}$ ) for 1:2 complexes using the MP2, B3LYPD3 and B2PLYPD3 methods with basis set 6-311++G(3df,3pd).

| Mode                           | O2S1        |     | O2S2        |     | O2S3        |     | O2S4        |     | O2S5        |     | O2S6        |     |
|--------------------------------|-------------|-----|-------------|-----|-------------|-----|-------------|-----|-------------|-----|-------------|-----|
|                                | $\bar{\nu}$ | I   |
| MP2                            |             |     |             |     |             |     |             |     |             |     |             |     |
| $\delta\text{SO}_2$            | 507         | 4   | 507         | 24  | 507         | 18  | 506         | 12  | 504         | 15  | 506         | 15  |
| $\delta\text{SO}_2$            | 507         | 54  | 510         | 27  | 511         | 43  | 508         | 36  | 508         | 35  | 509         | 32  |
| $\delta\text{NCO}$             | 617         | 50  | 615         | 46  | 597         | 58  | 601         | 52  | 562         | 110 | 562         | 112 |
| $\gamma\text{NCO}$             | 645         | 1   | 647         | 2   | 641         | 0   | 642         | 0   | 635         | 1   | 635         | 1   |
| $\delta\text{HNC}$             | 843         | 366 | 844         | 309 | 802         | 263 | 791         | 267 | 786         | 271 | 781         | 268 |
| $\nu_{\text{sym}}\text{SO}_2$  | 1136        | 28  | 1134        | 32  | 1131        | 14  | 1133        | 19  | 1128        | 22  | 1127        | 16  |
| $\nu_{\text{sym}}\text{SO}_2$  | 1136        | 24  | 1135        | 21  | 1131        | 34  | 1135        | 29  | 1134        | 19  | 1134        | 20  |
| $\nu_{\text{sym}}\text{NCO}$   | 1306        | 1   | 1305        | 2   | 1309        | 3   | 1310        | 7   | 1308        | 2   | 1308        | 2   |
| $\nu_{\text{asym}}\text{SO}_2$ | 1346        | 63  | 1345        | 137 | 1341        | 11  | 1345        | 151 | 1345        | 60  | 1344        | 231 |
| $\nu_{\text{asym}}\text{SO}_2$ | 1348        | 293 | 1347        | 188 | 1343        | 265 | 1347        | 196 | 1348        | 240 | 1348        | 104 |
| $\nu_{\text{asym}}\text{NCO}$  | 2335        | 815 | 2334        | 781 | 2336        | 592 | 2338        | 657 | 2336        | 602 | 2337        | 606 |
| $\nu\text{NH}$                 | 3611        | 581 | 3606        | 536 | 3655        | 318 | 3647        | 492 | 3711        | 169 | 3714        | 171 |
| B3LYPD3                        |             |     |             |     |             |     |             |     |             |     |             |     |
| $\delta\text{SO}_2$            | 523         | 8   | 522         | 29  | 524         | 20  | 523         | 14  | 521         | 17  | 523         | 12  |
| $\delta\text{SO}_2$            | 525         | 66  | 531         | 26  | 529         | 52  | 526         | 38  | 525         | 40  | 526         | 42  |
| $\delta\text{NCO}$             | 631         | 26  | 625         | 28  | 607         | 48  | 602         | 47  | 568         | 96  | 568         | 97  |
| $\gamma\text{NCO}$             | 649         | 4   | 654         | 3   | 643         | 2   | 644         | 1   | 638         | 3   | 638         | 3   |
| $\delta\text{HNC}$             | 874         | 324 | 873         | 241 | 820         | 264 | 813         | 246 | 812         | 275 | 806         | 272 |
| $\nu_{\text{sym}}\text{SO}_2$  | 1175        | 22  | 1175        | 22  | 1175        | 29  | 1177        | 33  | 1178        | 24  | 1176        | 15  |
| $\nu_{\text{sym}}\text{SO}_2$  | 1179        | 63  | 1178        | 68  | 1178        | 49  | 1179        | 48  | 1180        | 41  | 1180        | 38  |
| $\nu_{\text{sym}}\text{NCO}$   | 1337        | 4   | 1336        | 5   | 1339        | 3   | 1339        | 7   | 1336        | 2   | 1336        | 2   |
| $\nu_{\text{asym}}\text{SO}_2$ | 1361        | 199 | 1360        | 167 | 1360        | 13  | 1363        | 155 | 1366        | 134 | 1366        | 283 |
| $\nu_{\text{asym}}\text{SO}_2$ | 1366        | 288 | 1366        | 266 | 1366        | 376 | 1368        | 318 | 1372        | 294 | 1370        | 197 |
| $\nu_{\text{asym}}\text{NCO}$  | 2329        | 939 | 2327        | 901 | 2327        | 672 | 2327        | 731 | 2327        | 662 | 2327        | 666 |
| $\nu\text{NH}$                 | 3537        | 616 | 3536        | 537 | 3612        | 304 | 3590        | 451 | 3659        | 153 | 3663        | 155 |
| B2PLYPD3                       |             |     |             |     |             |     |             |     |             |     |             |     |
| $\delta\text{SO}_2$            | 514         | 5   | 514         | 26  | 516         | 21  | 513         | 11  | 512         | 17  | 514         | 12  |
| $\delta\text{SO}_2$            | 516         | 61  | 520         | 29  | 520         | 45  | 516         | 39  | 517         | 36  | 517         | 38  |
| $\delta\text{NCO}$             | 626         | 35  | 622         | 33  | 603         | 46  | 603         | 42  | 568         | 91  | 568         | 92  |
| $\gamma\text{NCO}$             | 644         | 2   | 648         | 3   | 639         | 1   | 640         | 0   | 634         | 2   | 634         | 2   |
| $\delta\text{HNC}$             | 874         | 360 | 874         | 295 | 827         | 270 | 818         | 262 | 808         | 280 | 802         | 277 |
| $\nu_{\text{sym}}\text{SO}_2$  | 1142        | 10  | 1141        | 13  | 1138        | 21  | 1141        | 24  | 1138        | 26  | 1137        | 16  |
| $\nu_{\text{sym}}\text{SO}_2$  | 1144        | 56  | 1142        | 57  | 1140        | 42  | 1143        | 39  | 1142        | 25  | 1143        | 26  |
| $\nu_{\text{sym}}\text{NCO}$   | 1316        | 3   | 1315        | 4   | 1317        | 3   | 1318        | 8   | 1316        | 2   | 1316        | 3   |
| $\nu_{\text{asym}}\text{SO}_2$ | 1337        | 135 | 1337        | 153 | 1334        | 12  | 1337        | 154 | 1339        | 71  | 1339        | 264 |
| $\nu_{\text{asym}}\text{SO}_2$ | 1341        | 287 | 1340        | 229 | 1338        | 321 | 1341        | 257 | 1342        | 289 | 1341        | 142 |
| $\nu_{\text{asym}}\text{NCO}$  | 2317        | 860 | 2316        | 832 | 2316        | 626 | 2317        | 680 | 2317        | 623 | 2317        | 627 |
| $\nu\text{NH}$                 | 3570        | 586 | 3565        | 540 | 3622        | 325 | 3614        | 459 | 3685        | 156 | 3688        | 158 |

Table S7. Theoretical infrared wavenumbers ( $\bar{\nu}$ ,  $\text{cm}^{-1}$ ) and intensities (I,  $\text{km mol}^{-1}$ ) for 2:1 complexes using the MP2, B3LYPD3 and B2PLYPD3 methods with basis set 6-311++G(3df,3pd).

| Mode                           | 2OS1        |      | 2OS2        |      | Mode                           | 2OS3        |      | 2OS4        |      | 2OS7        |      | 2OS8        |      | 2OS9        |      | 2OS10       |     | Mode                           | 2OS5        |     | 2OS6        |     |
|--------------------------------|-------------|------|-------------|------|--------------------------------|-------------|------|-------------|------|-------------|------|-------------|------|-------------|------|-------------|-----|--------------------------------|-------------|-----|-------------|-----|
|                                | $\bar{\nu}$ | I    | $\bar{\nu}$ | I    |                                | $\bar{\nu}$ | I    | $\bar{\nu}$ | I   |                                | $\bar{\nu}$ | I   | $\bar{\nu}$ | I   |
| MP2                            |             |      |             |      |                                |             |      |             |      |             |      |             |      |             |      |             |     |                                |             |     |             |     |
| $\delta\text{SO}_2$            | 508         | 36   | 508         | 30   | $\delta\text{SO}_2$            | 512         | 34   | 511         | 36   | 504         | 35   | 505         | 33   | 512         | 22   | 507         | 22  | $\delta\text{SO}_2$            | 506         | 25  | 507         | 34  |
| $\delta\text{NCO}$             | 594         | 164  | 592         | 24   | $\delta\text{NCO}$             | 599         | 58   | 586         | 78   | 612         | 16   | 581         | 100  | 578         | 38   | 563         | 149 | $\delta\text{NCO}$             | 569         | 56  | 567         | 45  |
| $\gamma\text{NCO}$             | 638         | 1    | 636         | 31   | $\delta\text{NCO}$             | 609         | 56   | 612         | 76   | 613         | 105  | 623         | 28   | 603         | 73   | 564         | 79  | $\gamma\text{NCO}$             | 629         | 17  | 630         | 1   |
| $\gamma\text{NCO}$             | 644         | 5    | 643         | 5    | $\gamma\text{NCO}$             | 640         | 0    | 636         | 1    | 647         | 0    | 632         | 1    | 632         | 1    | 635         | 1   | $\delta\text{NCO}$             | 632         | 7   | 632         | 22  |
| $\delta\text{NCO}$             | 660         | 4    | 649         | 2    | $\gamma\text{NCO}$             | 648         | 0    | 645         | 7    | 650         | 0    | 668         | 6    | 648         | 1    | 635         | 0   | $\gamma\text{NCO}$             | 657         | 3   | 646         | 0   |
| $\delta\text{HNC}$             | 825         | 559  | 809         | 193  | $\delta\text{HNC}$             | 777         | 449  | 786         | 358  | 757         | 403  | 814         | 318  | 801         | 136  | 774         | 386 | $\delta\text{HNC}$             | 821         | 255 | 823         | 177 |
| $\delta\text{HNC}$             | 915         | 235  | 886         | 494  | $\delta\text{HNC}$             | 797         | 56   | 854         | 241  | 803         | 234  | 882         | 260  | 834         | 310  | 781         | 147 | $\delta\text{HNC}$             | 889         | 276 | 881         | 309 |
| $\nu_{\text{sym}}\text{SO}_2$  | 1137        | 27   | 1135        | 29   | $\nu_{\text{sym}}\text{SO}_2$  | 1131        | 28   | 1132        | 24   | 1131        | 32   | 1129        | 23   | 1133        | 18   | 1134        | 19  | $\nu_{\text{sym}}\text{SO}_2$  | 1130        | 19  | 1129        | 21  |
| $\nu_{\text{sym}}\text{NCO}$   | 1305        | 2    | 1305        | 1    | $\nu_{\text{sym}}\text{NCO}$   | 1309        | 1    | 1304        | 0    | 1309        | 4    | 1301        | 1    | 1302        | 0    | 1308        | 3   | $\nu_{\text{sym}}\text{NCO}$   | 1299        | 3   | 1301        | 1   |
| $\nu_{\text{sym}}\text{NCO}$   | 1306        | 1    | 1309        | 10   | $\nu_{\text{sym}}\text{NCO}$   | 1310        | 7    | 1309        | 3    | 1317        | 28   | 1308        | 7    | 1307        | 4    | 1309        | 1   | $\nu_{\text{sym}}\text{NCO}$   | 1308        | 10  | 1308        | 6   |
| $\nu_{\text{asym}}\text{SO}_2$ | 1347        | 173  | 1344        | 175  | $\nu_{\text{asym}}\text{SO}_2$ | 1340        | 132  | 1341        | 128  | 1346        | 189  | 1345        | 145  | 1345        | 183  | 1346        | 149 | $\nu_{\text{asym}}\text{SO}_2$ | 1346        | 164 | 1344        | 129 |
| $\nu_{\text{asym}}\text{NCO}$  | 2329        | 1127 | 2330        | 1479 | $\nu_{\text{asym}}\text{NCO}$  | 2323        | 97   | 2332        | 1032 | 2337        | 1372 | 2327        | 905  | 2331        | 283  | 2337        | 773 | $\nu_{\text{asym}}\text{NCO}$  | 2327        | 576 | 2327        | 466 |
| $\nu_{\text{asym}}\text{NCO}$  | 2341        | 550  | 2343        | 120  | $\nu_{\text{asym}}\text{NCO}$  | 2352        | 1020 | 2337        | 379  | 2351        | 339  | 2341        | 521  | 2337        | 954  | 2338        | 457 | $\nu_{\text{asym}}\text{NCO}$  | 2343        | 719 | 2344        | 786 |
| $\nu\text{NH}$                 | 3525        | 764  | 3567        | 560  | $\nu\text{NH}$                 | 3634        | 262  | 3619        | 355  | 3642        | 1452 | 3569        | 981  | 3650        | 512  | 3715        | 153 | $\nu\text{NH}$                 | 3534        | 872 | 3557        | 769 |
| $\nu\text{NH}$                 | 3613        | 540  | 3610        | 751  | $\nu\text{NH}$                 | 3660        | 502  | 3671        | 296  | 3658        | 229  | 3666        | 160  | 3702        | 178  | 3716        | 198 | $\nu\text{NH}$                 | 3684        | 167 | 3690        | 176 |
| B3LYPD3                        |             |      |             |      |                                |             |      |             |      |             |      |             |      |             |      |             |     |                                |             |     |             |     |
| $\delta\text{SO}_2$            | 524         | 53   | 526         | 41   | $\delta\text{SO}_2$            | 528         | 42   | 529         | 41   | 522         | 49   | 523         | 37   | 528         | 28   | 524         | 24  | $\delta\text{SO}_2$            | 522         | 30  | 525         | 41  |
| $\delta\text{NCO}$             | 612         | 125  | 602         | 17   | $\delta\text{NCO}$             | 606         | 31   | 593         | 65   | 620         | 6    | 599         | 88   | 588         | 32   | 568         | 125 | $\delta\text{NCO}$             | 579         | 49  | 576         | 37  |
| $\gamma\text{NCO}$             | 640         | 2    | 643         | 8    | $\delta\text{NCO}$             | 612         | 70   | 624         | 58   | 623         | 85   | 629         | 26   | 615         | 62   | 569         | 76  | $\gamma\text{NCO}$             | 635         | 7   | 633         | 3   |
| $\gamma\text{NCO}$             | 647         | 3    | 648         | 3    | $\gamma\text{NCO}$             | 642         | 2    | 637         | 5    | 649         | 1    | 635         | 4    | 635         | 4    | 638         | 2   | $\delta\text{NCO}$             | 640         | 17  | 642         | 19  |
| $\delta\text{NCO}$             | 676         | 7    | 654         | 18   | $\gamma\text{NCO}$             | 649         | 2    | 648         | 10   | 654         | 0    | 673         | 6    | 652         | 1    | 638         | 4   | $\gamma\text{NCO}$             | 658         | 3   | 648         | 0   |
| $\delta\text{HNC}$             | 849         | 539  | 831         | 221  | $\delta\text{HNC}$             | 797         | 431  | 811         | 370  | 777         | 365  | 833         | 270  | 819         | 125  | 796         | 394 | $\delta\text{HNC}$             | 843         | 237 | 843         | 164 |
| $\delta\text{HNC}$             | 945         | 201  | 915         | 433  | $\delta\text{HNC}$             | 819         | 73   | 874         | 197  | 825         | 234  | 909         | 291  | 848         | 301  | 804         | 144 | $\delta\text{HNC}$             | 908         | 272 | 901         | 298 |
| $\nu_{\text{sym}}\text{SO}_2$  | 1176        | 47   | 1178        | 45   | $\nu_{\text{sym}}\text{SO}_2$  | 1176        | 38   | 1176        | 42   | 1178        | 55   | 1178        | 36   | 1175        | 29   | 1178        | 27  | $\nu_{\text{sym}}\text{SO}_2$  | 1179        | 30  | 1180        | 33  |
| $\nu_{\text{sym}}\text{NCO}$   | 1337        | 5    | 1337        | 7    | $\nu_{\text{sym}}\text{NCO}$   | 1340        | 3    | 1337        | 1    | 1339        | 7    | 1331        | 1    | 1334        | 0    | 1337        | 3   | $\nu_{\text{sym}}\text{NCO}$   | 1330        | 2   | 1333        | 1   |
| $\nu_{\text{sym}}\text{NCO}$   | 1338        | 2    | 1338        | 8    | $\nu_{\text{sym}}\text{NCO}$   | 1340        | 6    | 1338        | 4    | 1344        | 42   | 1338        | 11   | 1338        | 12   | 1337        | 1   | $\nu_{\text{sym}}\text{NCO}$   | 1338        | 12  | 1338        | 8   |
| $\nu_{\text{asym}}\text{SO}_2$ | 1361        | 230  | 1365        | 233  | $\nu_{\text{asym}}\text{SO}_2$ | 1358        | 180  | 1359        | 185  | 1371        | 249  | 1371        | 205  | 1364        | 249  | 1364        | 211 | $\nu_{\text{asym}}\text{SO}_2$ | 1371        | 229 | 1369        | 186 |
| $\nu_{\text{asym}}\text{NCO}$  | 2321        | 1299 | 2320        | 1590 | $\nu_{\text{asym}}\text{NCO}$  | 2313        | 141  | 2325        | 1190 | 2328        | 1693 | 2319        | 1141 | 2326        | 156  | 2328        | 819 | $\nu_{\text{asym}}\text{NCO}$  | 2318        | 657 | 2319        | 530 |
| $\nu_{\text{asym}}\text{NCO}$  | 2337        | 653  | 2338        | 211  | $\nu_{\text{asym}}\text{NCO}$  | 2345        | 1121 | 2332        | 449  | 2342        | 201  | 2335        | 484  | 2333        | 1276 | 2329        | 531 | $\nu_{\text{asym}}\text{NCO}$  | 2338        | 816 | 2340        | 893 |
| $\nu\text{NH}$                 | 3437        | 806  | 3492        | 550  | $\nu\text{NH}$                 | 3593        | 127  | 3564        | 392  | 3571        | 1457 | 3497        | 1022 | 3594        | 530  | 3665        | 86  | $\nu\text{NH}$                 | 3463        | 893 | 3490        | 783 |
| $\nu\text{NH}$                 | 3543        | 572  | 3542        | 823  | $\nu\text{NH}$                 | 3609        | 588  | 3628        | 271  | 3590        | 300  | 3620        | 149  | 3661        | 167  | 3665        | 232 | $\nu\text{NH}$                 | 3640        | 151 | 3648        | 162 |

| B2PLYPD3                          |      |      |      |      |                                   |      |      |      |      |      |      |      |     |      |      |      |     |                                   |      |     |      |     |
|-----------------------------------|------|------|------|------|-----------------------------------|------|------|------|------|------|------|------|-----|------|------|------|-----|-----------------------------------|------|-----|------|-----|
| δSO <sub>2</sub>                  | 515  | 42   | 516  | 36   | δSO <sub>2</sub>                  | 521  | 36   | 520  | 34   | 512  | 40   | 513  | 33  | 520  | 25   | 515  | 23  | δSO <sub>2</sub>                  | 514  | 27  | 516  | 37  |
| δNCO                              | 605  | 133  | 598  | 15   | δNCO                              | 604  | 41   | 588  | 63   | 616  | 8    | 590  | 88  | 586  | 32   | 568  | 123 | δNCO                              | 579  | 48  | 574  | 36  |
| γNCO                              | 637  | 1    | 638  | 14   | δNCO                              | 613  | 51   | 623  | 65   | 618  | 81   | 624  | 26  | 611  | 58   | 569  | 66  | γNCO                              | 630  | 11  | 629  | 2   |
| γNCO                              | 645  | 3    | 644  | 11   | γNCO                              | 639  | 1    | 634  | 2    | 646  | 0    | 631  | 2   | 631  | 3    | 633  | 1   | δNCO                              | 633  | 12  | 635  | 19  |
| δNCO                              | 663  | 5    | 647  | 8    | γNCO                              | 646  | 1    | 643  | 7    | 650  | 0    | 668  | 6   | 648  | 1    | 633  | 2   | γNCO                              | 657  | 3   | 645  | 0   |
| δHNC                              | 851  | 572  | 835  | 211  | δHNC                              | 801  | 450  | 811  | 407  | 782  | 381  | 836  | 293 | 826  | 144  | 794  | 422 | δHNC                              | 845  | 237 | 847  | 165 |
| δHNC                              | 945  | 214  | 914  | 455  | δHNC                              | 824  | 60   | 883  | 224  | 828  | 237  | 903  | 277 | 858  | 298  | 801  | 128 | δHNC                              | 909  | 276 | 905  | 305 |
| v <sub>sym</sub> SO <sub>2</sub>  | 1143 | 35   | 1142 | 36   | v <sub>sym</sub> SO <sub>2</sub>  | 1140 | 33   | 1141 | 32   | 1140 | 42   | 1139 | 28  | 1140 | 23   | 1142 | 22  | v <sub>sym</sub> SO <sub>2</sub>  | 1141 | 24  | 1140 | 25  |
| v <sub>sym</sub> NCO              | 1315 | 4    | 1316 | 5    | v <sub>sym</sub> NCO              | 1318 | 3    | 1315 | 1    | 1318 | 6    | 1310 | 1   | 1312 | 0    | 1317 | 5   | v <sub>sym</sub> NCO              | 1309 | 2   | 1311 | 1   |
| v <sub>sym</sub> NCO              | 1317 | 1    | 1317 | 9    | v <sub>sym</sub> NCO              | 1318 | 8    | 1317 | 4    | 1324 | 44   | 1317 | 9   | 1317 | 12   | 1317 | 1   | v <sub>sym</sub> NCO              | 1317 | 11  | 1317 | 7   |
| v <sub>asym</sub> SO <sub>2</sub> | 1338 | 203  | 1338 | 202  | v <sub>asym</sub> SO <sub>2</sub> | 1333 | 158  | 1334 | 160  | 1343 | 213  | 1342 | 175 | 1338 | 213  | 1338 | 178 | v <sub>asym</sub> SO <sub>2</sub> | 1342 | 196 | 1341 | 157 |
| v <sub>asym</sub> NCO             | 2310 | 1196 | 2309 | 1487 | v <sub>asym</sub> NCO             | 2303 | 121  | 2314 | 1205 | 2318 | 1490 | 2309 | 997 | 2313 | 212  | 2317 | 817 | v <sub>asym</sub> NCO             | 2308 | 591 | 2308 | 475 |
| v <sub>asym</sub> NCO             | 2324 | 575  | 2325 | 169  | v <sub>asym</sub> NCO             | 2334 | 1060 | 2319 | 298  | 2332 | 263  | 2323 | 490 | 2320 | 1099 | 2319 | 455 | v <sub>asym</sub> NCO             | 2326 | 760 | 2327 | 827 |
| vNH                               | 3483 | 756  | 3529 | 522  | vNH                               | 3599 | 245  | 3580 | 408  | 3603 | 1477 | 3536 | 969 | 3616 | 536  | 3690 | 93  | vNH                               | 3498 | 864 | 3523 | 759 |
| vNH                               | 3574 | 567  | 3572 | 793  | vNH                               | 3625 | 537  | 3641 | 293  | 3620 | 241  | 3644 | 149 | 3677 | 165  | 3690 | 231 | vNH                               | 3660 | 153 | 3666 | 161 |
